# Supplementary material
Source: publisher site journal article supplement (https://www.dovepress.com/article/446614)
Supplement: Supplementary file 1 [file get_supplementary_file.php]

Table S1: **Literature Review**

| **#** | **Authors** | **Title** | **Design and Aim** | **Industry** | **Summary / conclusion** |
| --- | --- | --- | --- | --- | --- |
| 1 | Joshi, Sangeeta M., et al.  2016 45 | Developing Key Performance Indicators framework for evaluating performance of engineering faculty | Literature review to Categorize performance indicators into broad areas and to identify key performance indicators (KPIs) for evaluating performance of faculty | Engineering Higher Education | - Faculties have a huge task of taking each student as an individual entity as finalizing on the result. Therefore, KPI for faculties are to be considered very minutely and all-round inclusions need to be done. - Develop a framework for KPIs taking into consideration development of students, faculty, and Institution. |
| 2 | Khashab, B., et al  2022 62 | Analyzing enterprise resources for developing CRM framework in higher education institutions | Semi-structured interviews and focus group sessions, to ensure that strategic Higher Education Institutions (HEI), Customer Relationship Management (CRM) desires, expectation and needs (DEN) are effectively captured, and that the requirements are appropriately mapped to existing activities | Higher Education Institutions (HEI) | It is critical that HEIs implement Customer Relationship Management (CRM) solutions that align with their top-down business strategy. Method for CRM components mapping. Understanding existing processes, and finding agreement on a shared process, is key for CRM success. Disconnected processes rarely result in seamless cross-functional processes; instead causing inconsistent and poor customer process experience |
| 3 | Arora, Amishi, and Sukhbir Kaur.  2015 41 | Performance Assessment Model for Management Educators Based on KRA/KPI | A conceptual survey-based study, to understand the Key Performance indicators (KPI) for the teachers in management education.  and also, to understand how the same can be incorporated in the Annual Performance Analysis format | Higher Education, Management | | Findings From the KPI Construct Survey Questionnaire | Execution of KPI to assess the findings are based on; | | --- | --- | | 1. Vision, Mission & Program Educational Objectives (PEOs) 2. Program outcomes 3. Program Curriculum 4. Students Performance 5. Faculties 6. Facilities & technical staff 7. Academic Support units and Teaching- Learning Process 8. Governance, institutional support & Financial Resources 9. Continuous improvement | 1. Key Resource Person 2. Key Performance Area 3. Key Performance Indicator 4. Objective Outcome (Decree) 5. Budget | |
| 4 | Varouchas, Emmanouil, Miguel-Ángel Sicilia, and Salvador Sánchez-Alonso  2018 63 | Academics’ Perceptions on Quality in Higher  Education Shaping Key Performance Indicator | An analytic discussion of perceptions of higher education administrators and professors about quality, leading to a significant enrichment of the relevant literature. A set of innovative generic KPIs which can be used in multidimensional quality assessment in higher education is eventually proposed | Higher Education Institutions (HEIs) | Quality indicators could be encapsulated in KPIs to measure multiple dimensions of quality in higher education:  **Generic KPIs**   1. Preparation time = developments in the field + frequency of teaching + motivation time + engagement scenario + core knowledge 2. Technology infusion **=** (blended + CMS)/traditional 3. Industry alignment **=** number of case study analyses per course x time allocated per analysis/total 4. Course teaching hours in an academic term 5. Interaction with practitioners **=** number of Interactions per course per academic term 6. Research works **=** number of research works delivered per major 7. Research work depth= number of student works published in peer-reviewed conferences 8. Engagement= documented discussions/total number of 50-min lectures per course 9. Skillset= number of intended skills per course/average class grade per course 10. Interdisciplinary character= number of disciplines involved in teaching material of course |
| 5 | Valdez, Alicia, et al  2017 64 | Development and Implementation of the Balanced  Scorecard for a Higher Educational Institution using.  Business Intelligence Tools | Literature review to define key elements for the Balanced Scorecard (BSC), such as: To have an organizational framework to specify the structure of the BSC, determine the organization of the project, ensure optimal project management, plan communication, and consider critical success factors. | Higher Education Institutions (HEIs) | **Three types of BSC:**  Type 1: A specific multidimensional framework for strategic performance measurement  Type 2: A Type 1 BSC with cause-effect relationships  Type 3: a combination of type 2 BSC with objectives, action plans, results, and connecting incentives with BSC.  Once the strategic map is constructed and detailed, the strategic objectives are clearly defined, the selection of indicators is the  Natural continuation of the process, where the indicator is an element of objective measurement. |
| 6 | Badawy, Mohammed, Abd El-Aziz, and Heshan Hefny 29 | Exploring and Measuring the Key Performance Indicators in Higher Education  Institutions | Text mining and feature extraction technique to explore and measure KPIs. | Higher Education Institutions (HEIs) | This work proposed a new model to explore and measure KPIs in HEIs using keyword extraction method for extracting main features from unstructured data (textbook). An approach based on term frequency technique was developed for this purpose. The approach was tested, and results showed that, it could be applied for any course. Exploring KPIs depending on analysis learning objectives of textbook in higher education that achieved intended learning outcomes for the institution. |
| 7 | Hamdan Alghamdi, Amani K., Ghazi Alotaibi, and Osama Ibrahim 42 | Institutional Academic Assessment  and Effectiveness in Higher Education: Saudi Arabia Case Study | Case study to Emulating a Saudi university approach affords other Saudi higher education institutions the opportunity to increase Saudi graduates’ ability to directly contribute to the country’s economy, ultimately promoting economic growth, diversification, and development as envisioned in Vision 2030 | Higher Education Institutions (HEIs) | There is no perfect method of discharging the monitoring role without ongoing revision to the KPIs. The key to the successful assessment of institutional effectiveness is to ensure that the information obtained from assessments is used to inform strategic planning and decision-making, including resource allocation.   - The key to the successful assessment   of institutional effectiveness is to ensure that the information obtained from assessments is used to inform strategic planning and decision-making, including resource allocation.   - This case especially focuses on how the university dealt with faculty members and students’ academic performance components (via the establishment of Key Performance Indicators [KPIs]) relative to IAU’s primary mission, objectives, and strategic plan |
| 8 | Housawi, Abdulrahman, et al 65 | Evaluation of Key Performance Indicators (KPIs) for  Sustainable Postgraduate Medical Training:  An Opportunity for Implementing an Innovative  Approach to Advance the Quality of Training  Programs at the Saudi Commission for Health  Specialties (SCFHS) | Literature review to summarize the key aspects of the Training Quality Assurance Initiative and suggest a new approach for designing a new data and services ecosystem for personalized health professionals training in the KSA. The study also contributes to the theoretical knowledge on the integration of sustainability and medical training and education by proposing a framework that can enhance future initiatives from various health organizations. | Training  Programs at the Saudi Commission for Health  Specialties (SCFHS) | - The first significant contribution of this research is related to the introduction of a full set of measurable, trusted, and reliable KPIs defined for efficient medical training. Briefly, 23 KPIs were used to measure the eefficiency of medical training around three dimensions, namely, training governance, learning, and reaction. We do plan shortly to update this functional set of KPIs with additional ones related to active learning strategies as well as community engagement in the context of a newly developed Social Network of Medical Experts. Another direction for future enhancement of this analytics approach is to emphasize also research and social impact. - Another significant dimension of our research study was the synthesis of the key finding of this Training Quality Assurance Initiative towards the generalization of findings for future exploitation and best practices communication. As a result, we introduced the Sustainable Medical Education Framework, with four integrative components, namely big data and analytics ecosystem, SCFHS quality and performance management, enhanced decision-making capability, and sustainability |
| 9 | Mykhailo Broshkov et al 2020 66 | Management of Key Performance Indicators by Heads of Higher Education Institutions | A management system of key performance indicators is proposed to solve management-related issues and the motivation of staff on all levels of management. The study contributes to the development of the environment, which is financially profitable, quality of education, social security, and scientific potential that helps institution management to achieve their goals effectively. | Higher Education Institutions (HEIs) | - The study halt that despite the commercial focus and relatively recent development, the use of key performance indicators (KPIs) as a management system has proven effective for solving management issues and promoting staff motivation at all levels. Moreover, implementing this system can benefit all stakeholders, not just leadership. - By motivating staff to achieve set goals, educational institutions can continuously develop and improve programs and events, which is advantageous to students. The involvement of teaching staff in enhancing the quality of education further contributes to this goal. - In addition, institutions can use KPIs to attract and retain valuable employees through competitive pay and transparent bonus systems, reducing non-targeted expenses. By directly influencing their income, teaching staff can be motivated to achieve a high overall result, contributing to a more motivating work environment. |
| 10 | Zorica Lazić et al 2021 67 | Improvement of Quality of Higher Education Institutions as a Basis for Improvement of Quality of Life | A new ranking system was developed after evaluating various ranking systems, examining their features, advantages, and disadvantages, such that the new system incorporates criteria weights and different perspectives to address the needs of the modern digital age. | Higher Education Institutions (HEIs) | The formulation of a model for performance-based evaluation in higher education (HE) - for both institutions and study programs hold significant significance for various groups of stakeholders such as.   - The academic community and the universities in a specific country - Students - Industry and business - The National Employment Service and the Statistical Office of the Republic of Serbia’s - Government and state institutions (policymakers) - The newly developed mathematical model has enabled the creation of a quality assessment and ranking system for higher education institutions, as well as a decision-support system for identifying the optimal strategy to enhance the performance of study programs and HE institutions in terms of quality. |
| 11 | R. Chinta, M Et al. 2016  61 | A conceptual framework for evaluating higher education institutions | A context, input, process, and product (CIPP) model were used to develop a framework for evaluating higher education institutions. The framework, model, and guidelines proposed in the study, as well as any evidence supporting their effectiveness, are useful for institutions to identify areas for improvement and make informed decisions about how to allocate resources and improve their programs. | Higher Education Institutions (HEIs) | - This paper addresses a gap in the CIPP model by proposing nine perspectives on metrics and benchmarks that can be used to assess the performance of higher education institutions. Incorporating benchmarks into the model can help institutions to identify areas where they need to improve and develop strategies for achieving better outcomes. - By looking at an institution's inputs, processes, and outputs and comparing them to benchmarks, it becomes possible to identify areas where the institution is underperforming and to take corrective action. This can help institutions to continuously improve and to ensure that they are providing a high-quality education to their students. - Also, comparing a higher education institution's performance to an aspirational benchmark rather than just external competitors can be more effective in inspiring further performance improvement initiatives. |
